# Supplementary material
Source: ML conference proceedings conference paper supplement (https://openreview.net/forum?id=YVWw8OSEse)

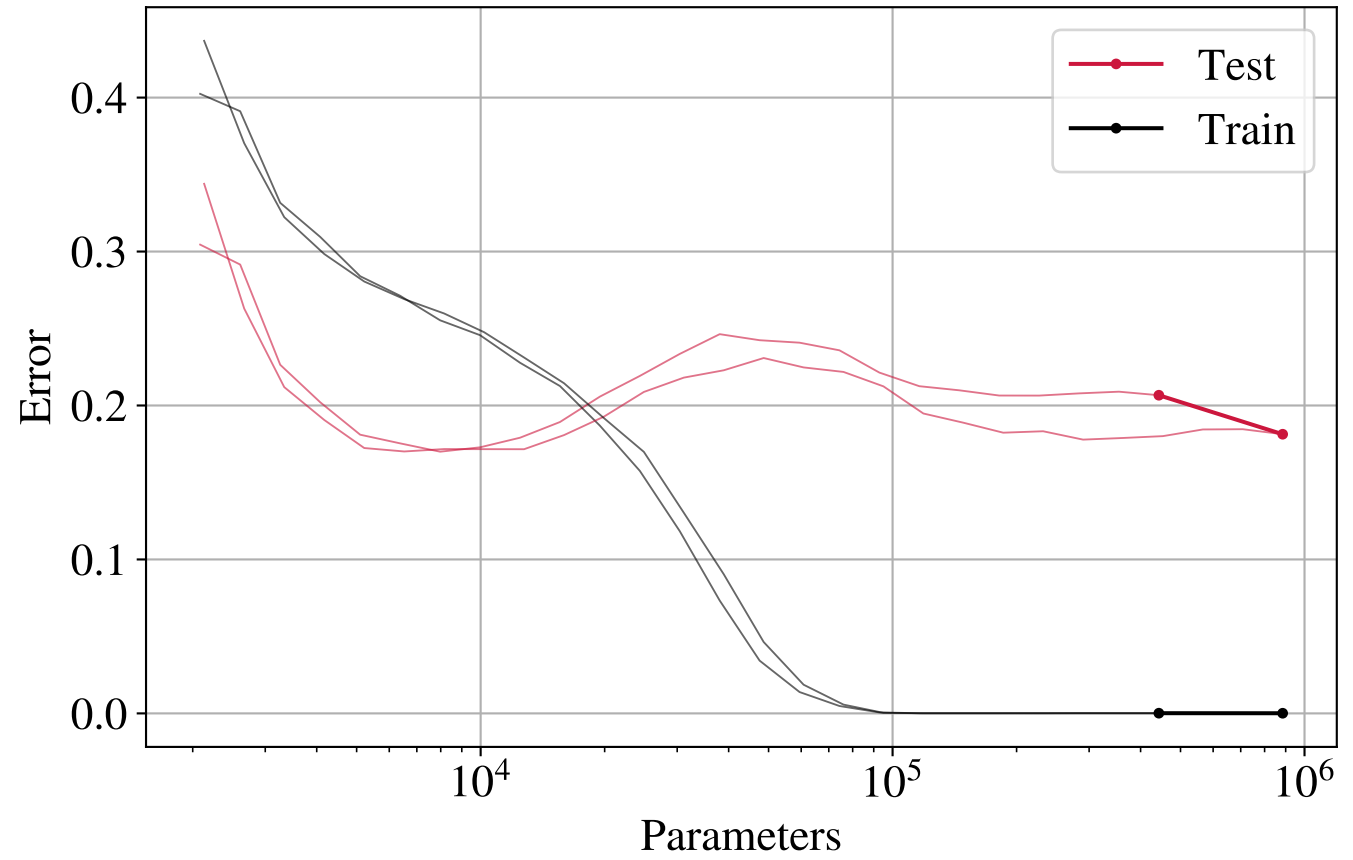

Supplement: supplementary_material [file attachment]

# Linear

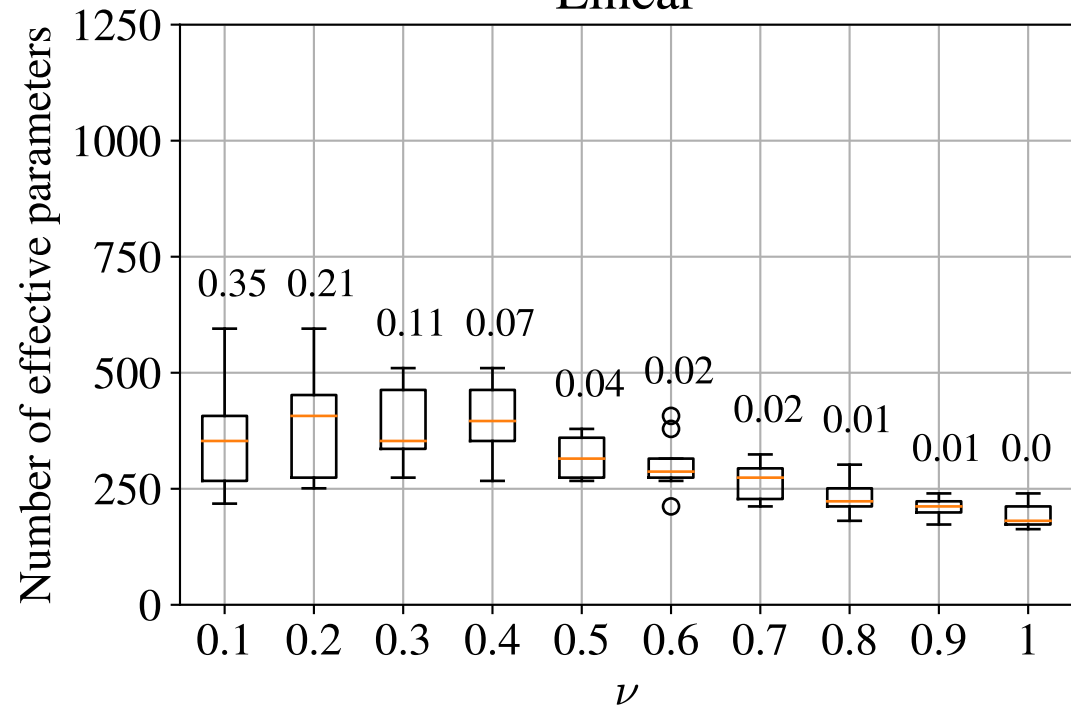

Supplement: supplementary_material [file attachment]

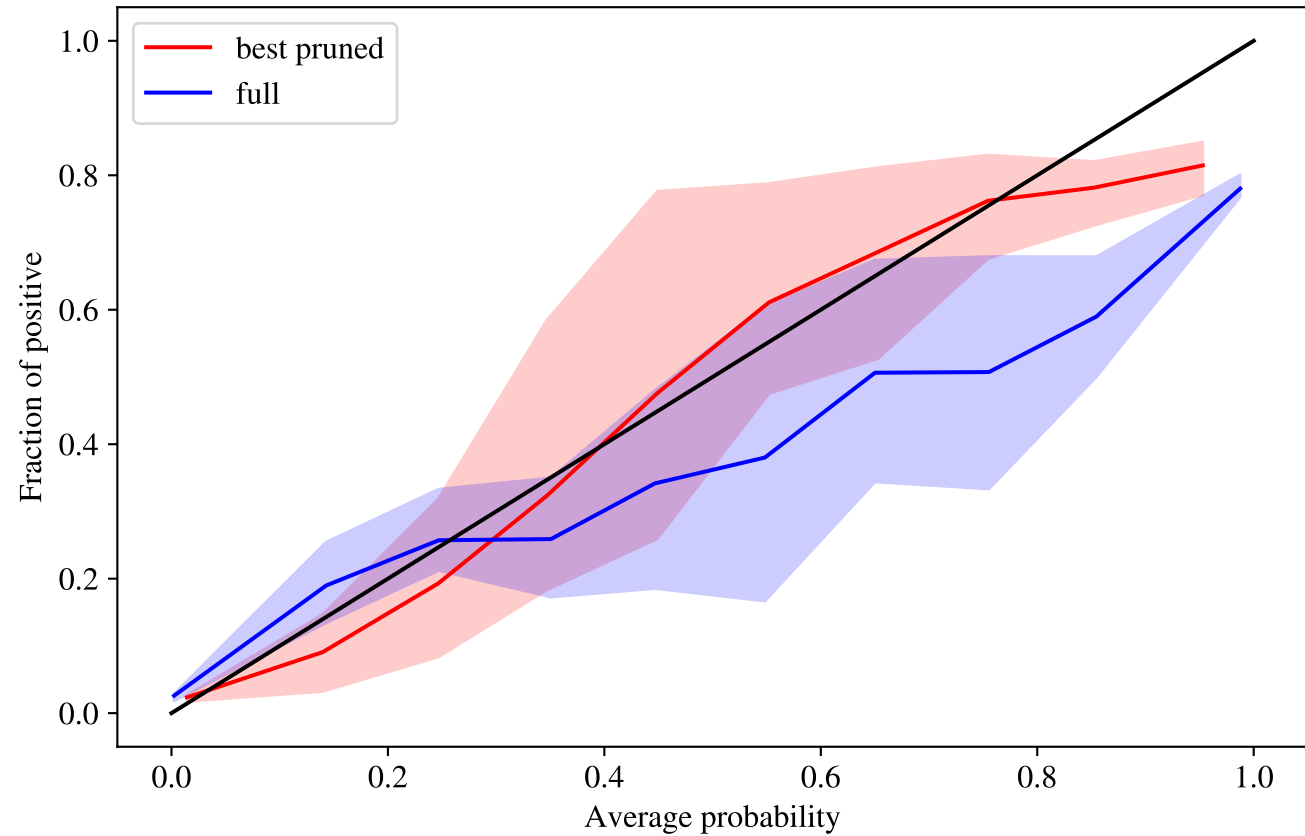

Supplement: supplementary_material [file attachment]

Best pruned

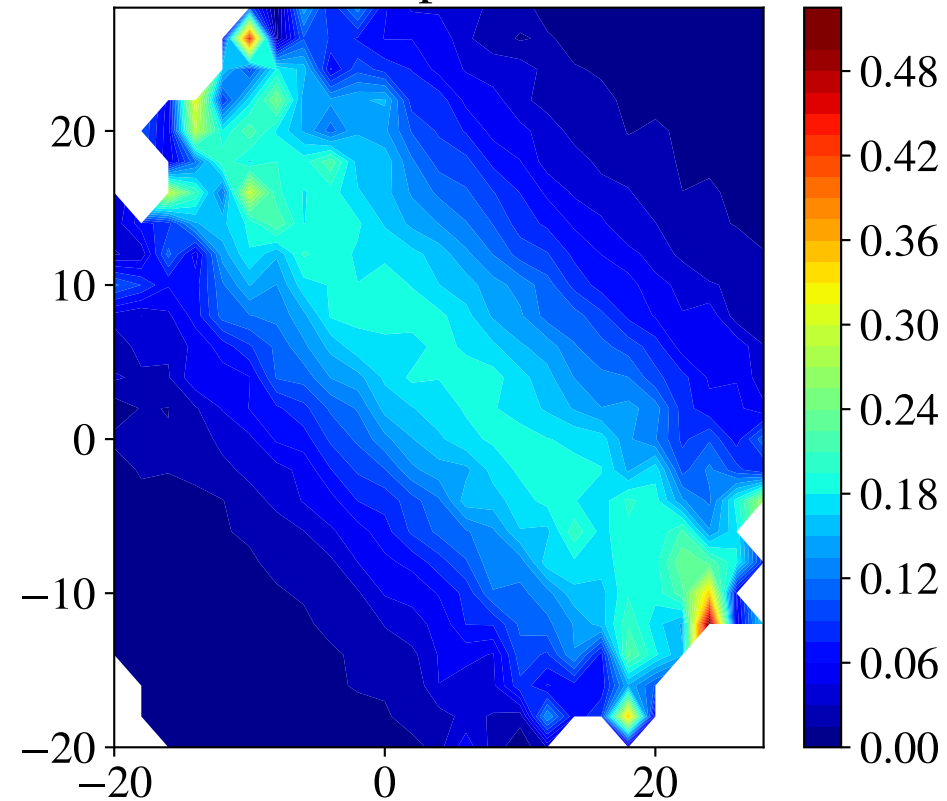

Full

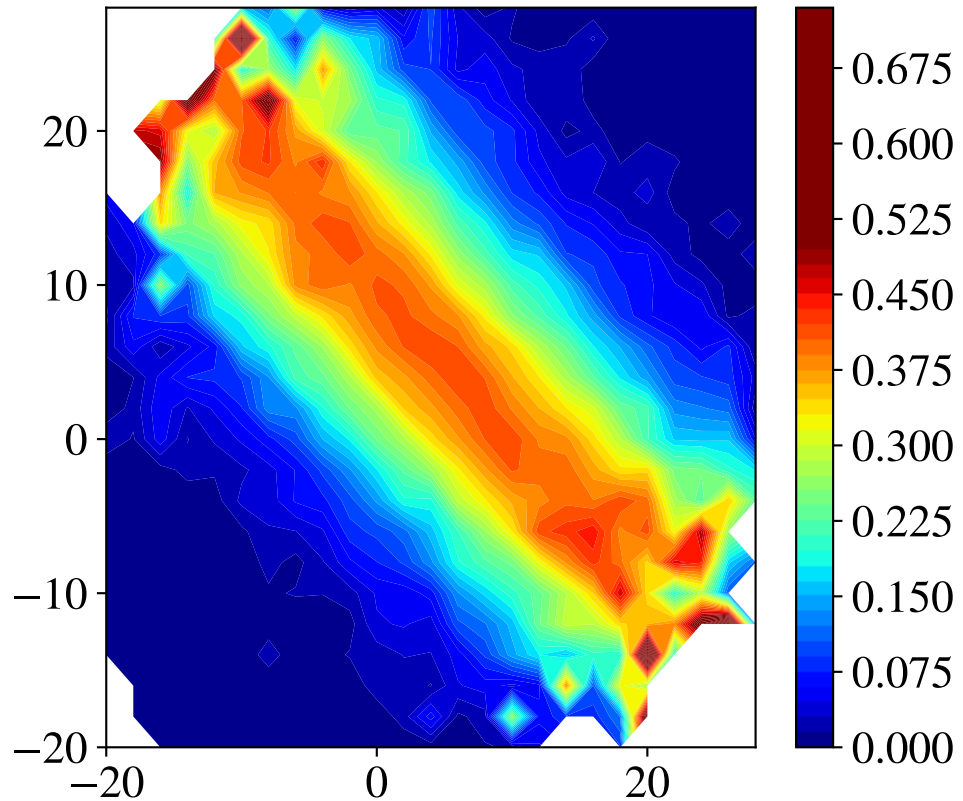

Supplement: supplementary_material [file attachment]

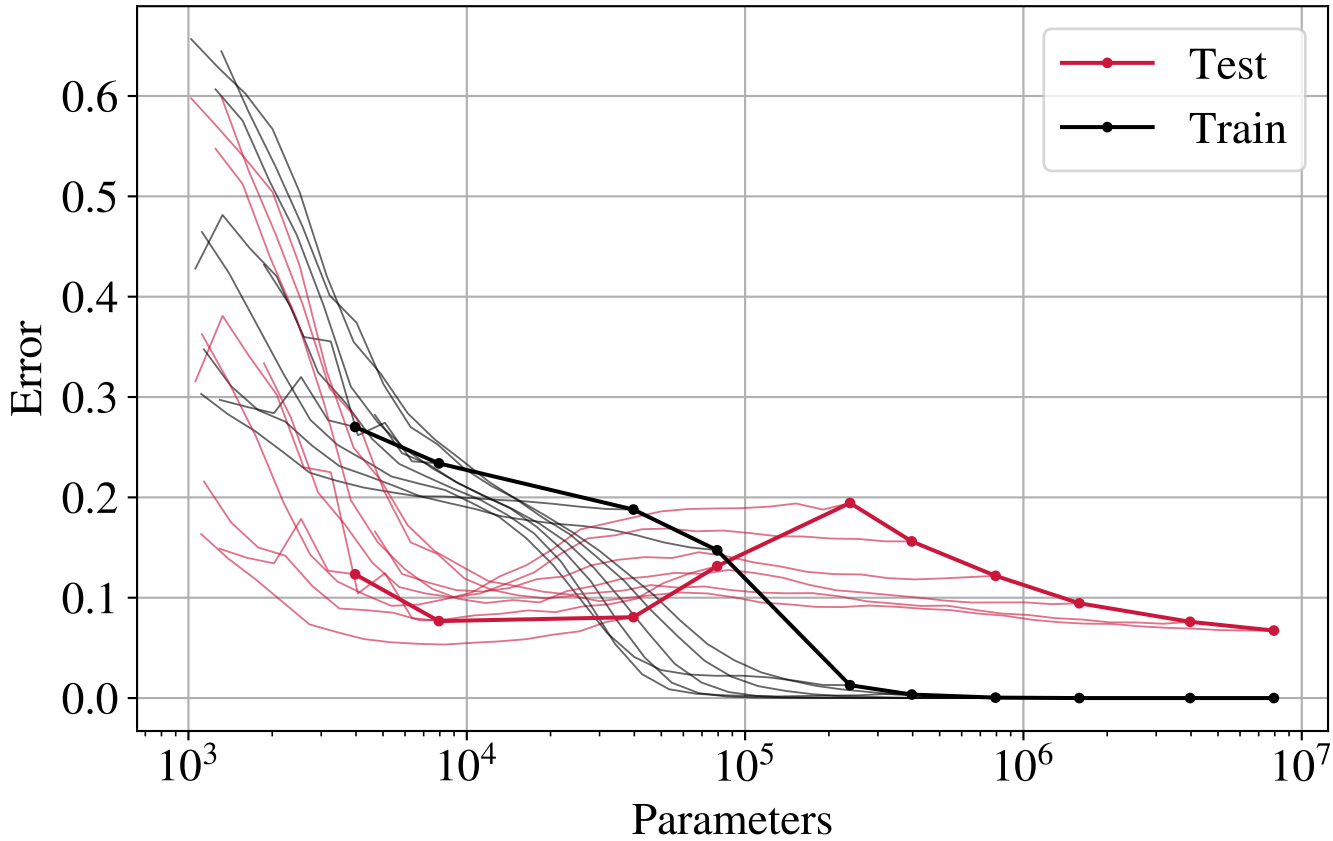

Supplement: supplementary_material [file attachment]

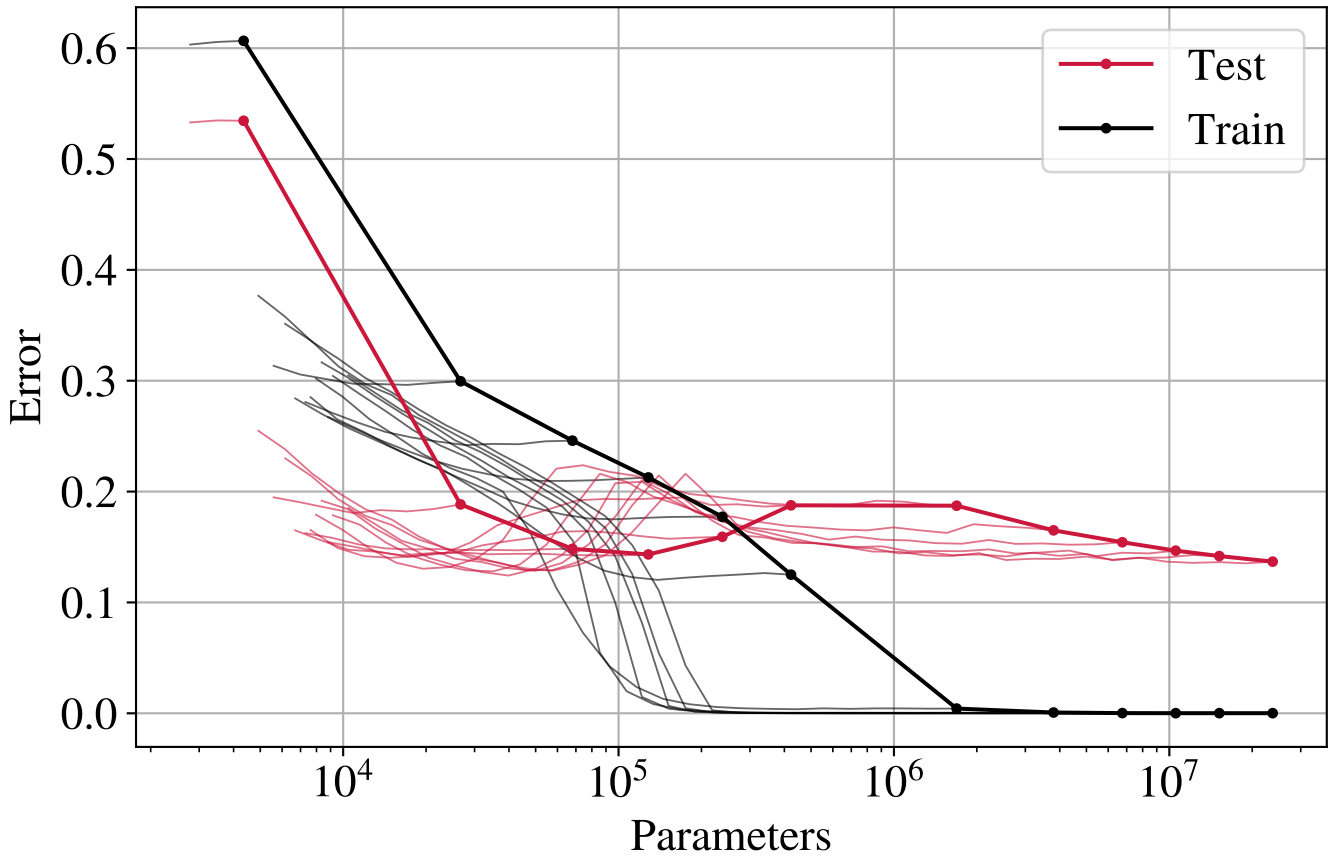

Supplement: supplementary_material [file attachment]

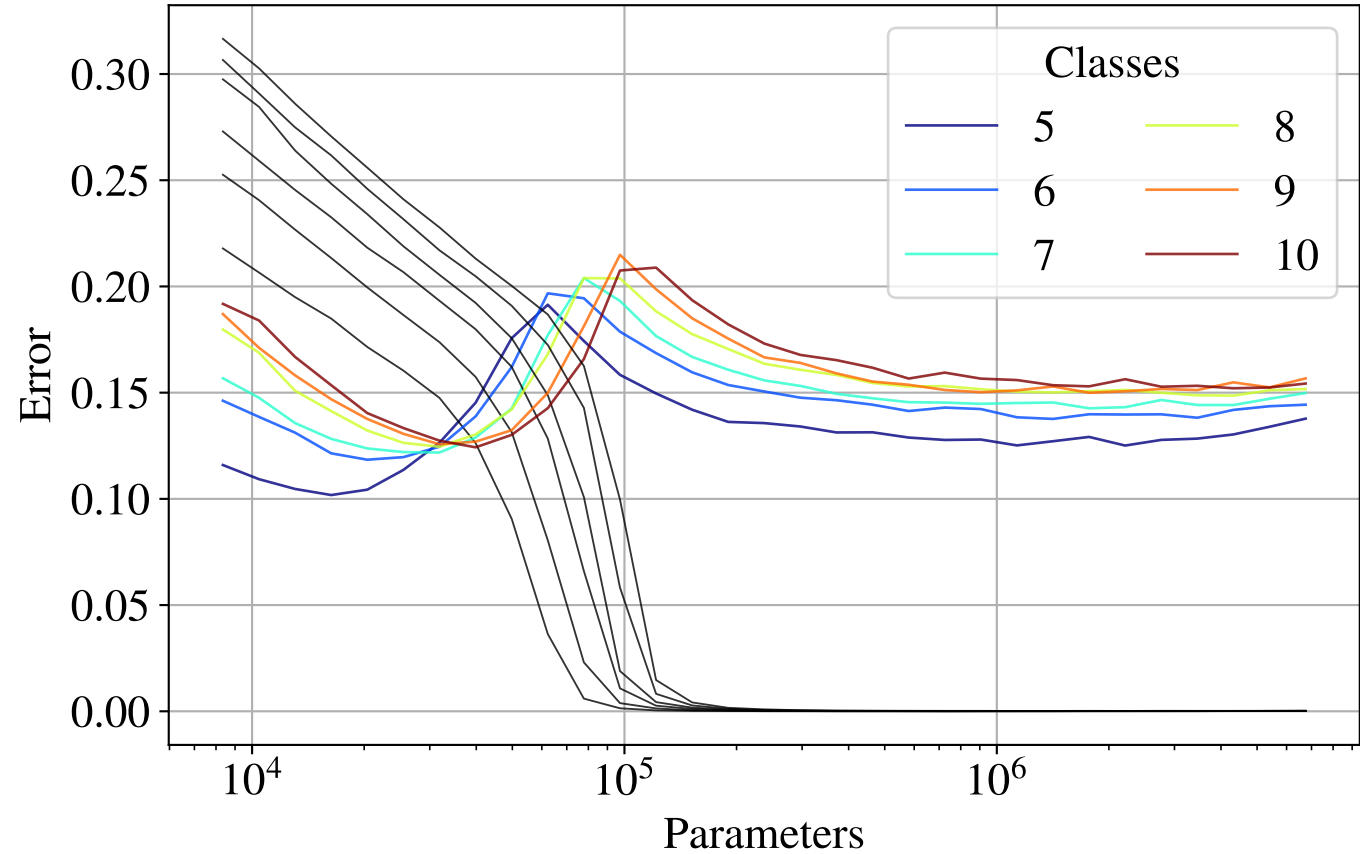

Supplement: supplementary_material [file attachment]

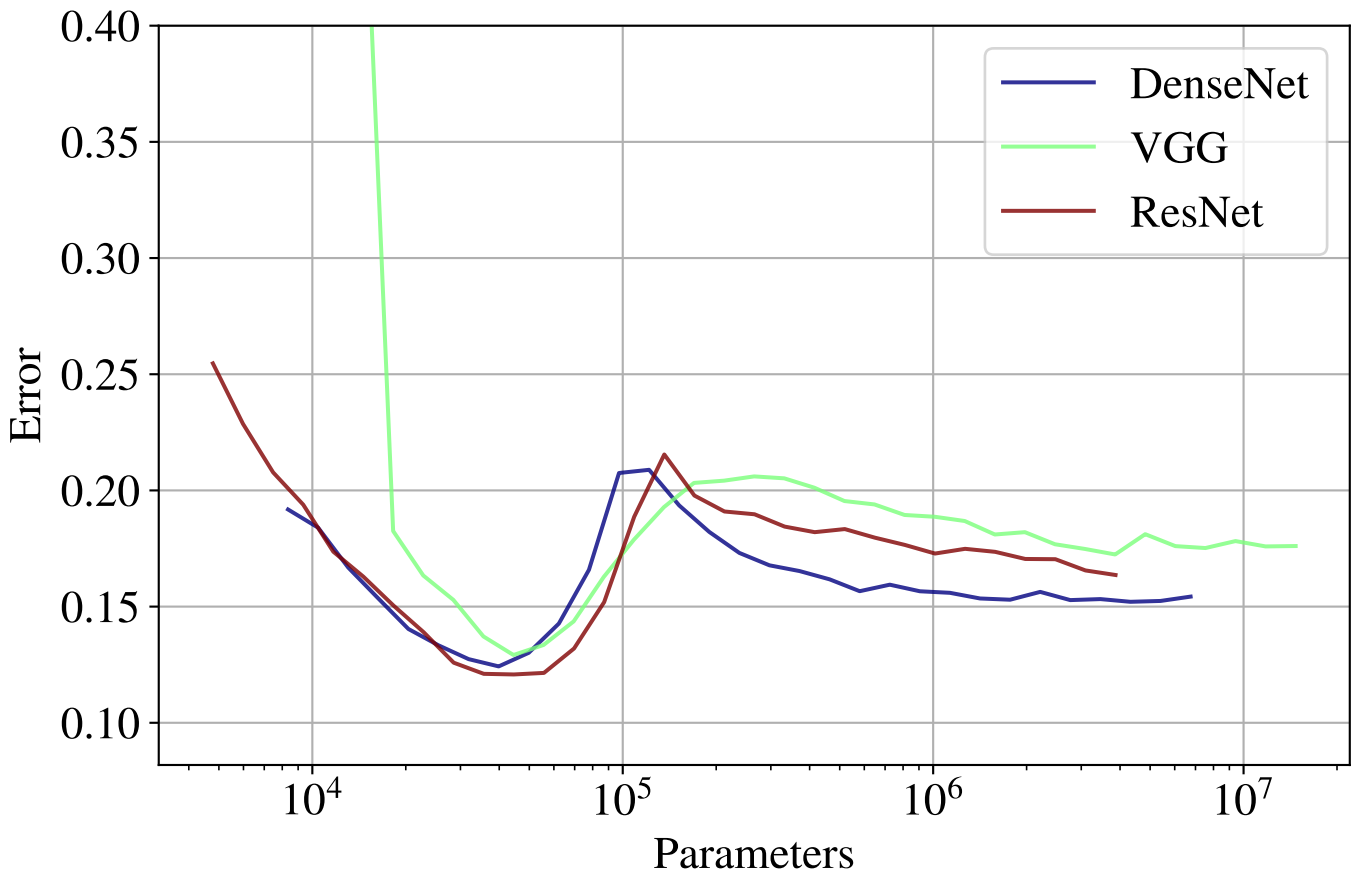

Supplement: supplementary_material [file attachment]

Fraction of positive

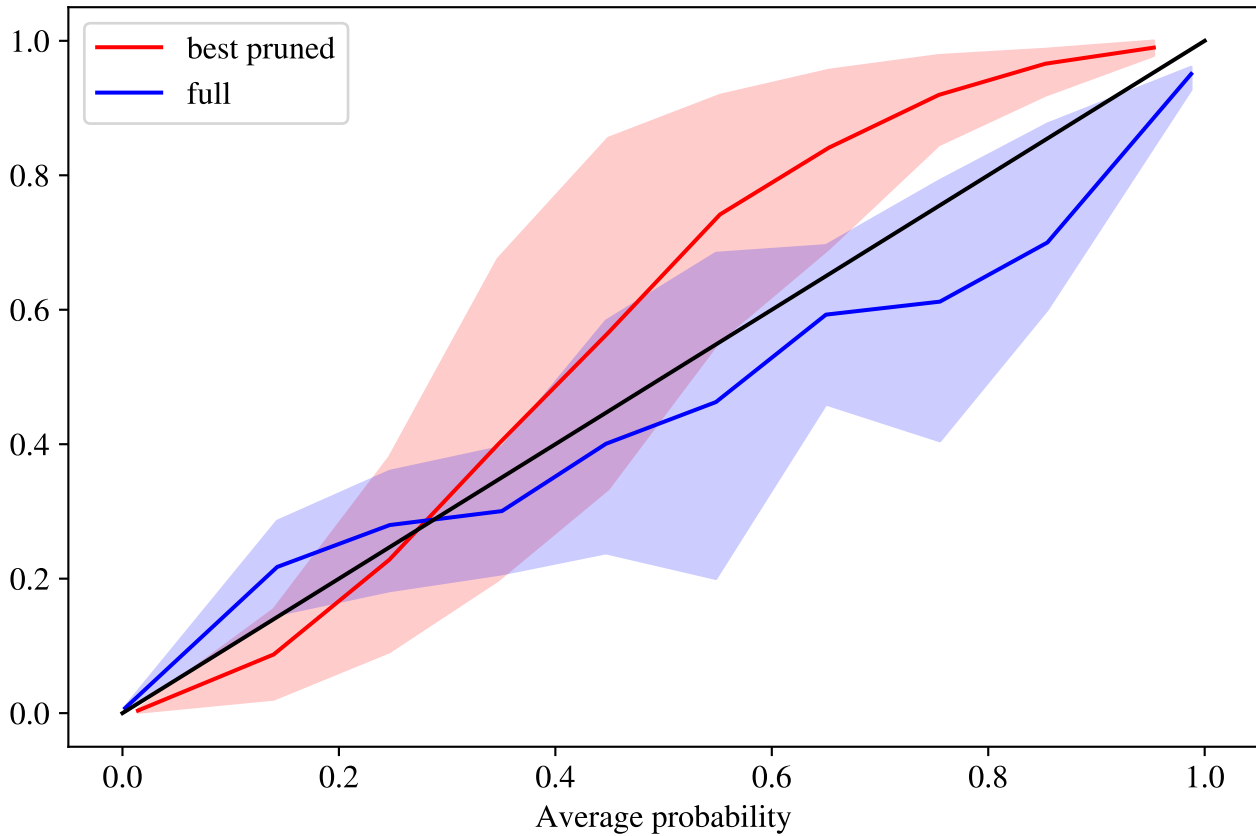

Supplement: supplementary_material [file attachment]

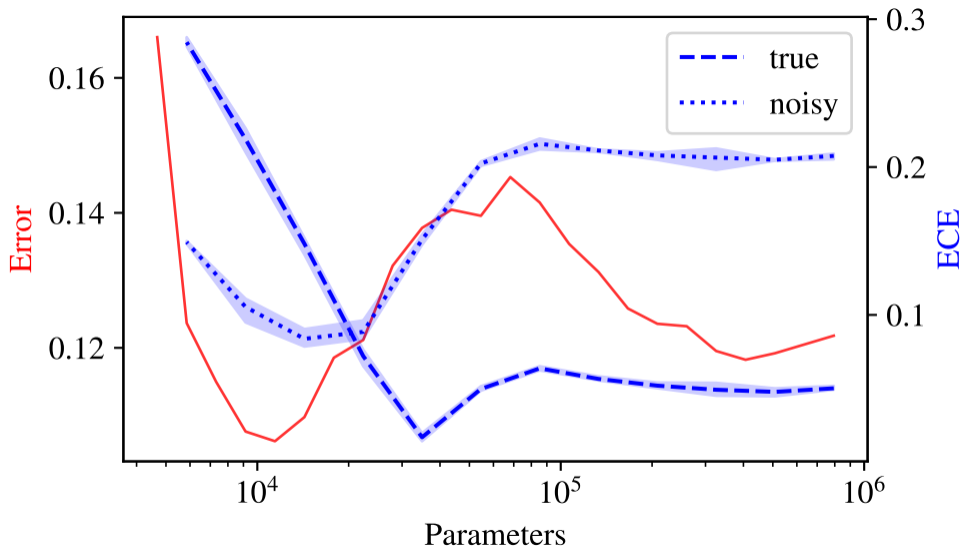

Supplement: supplementary_material [file attachment]

$$\nu = 0.8$$

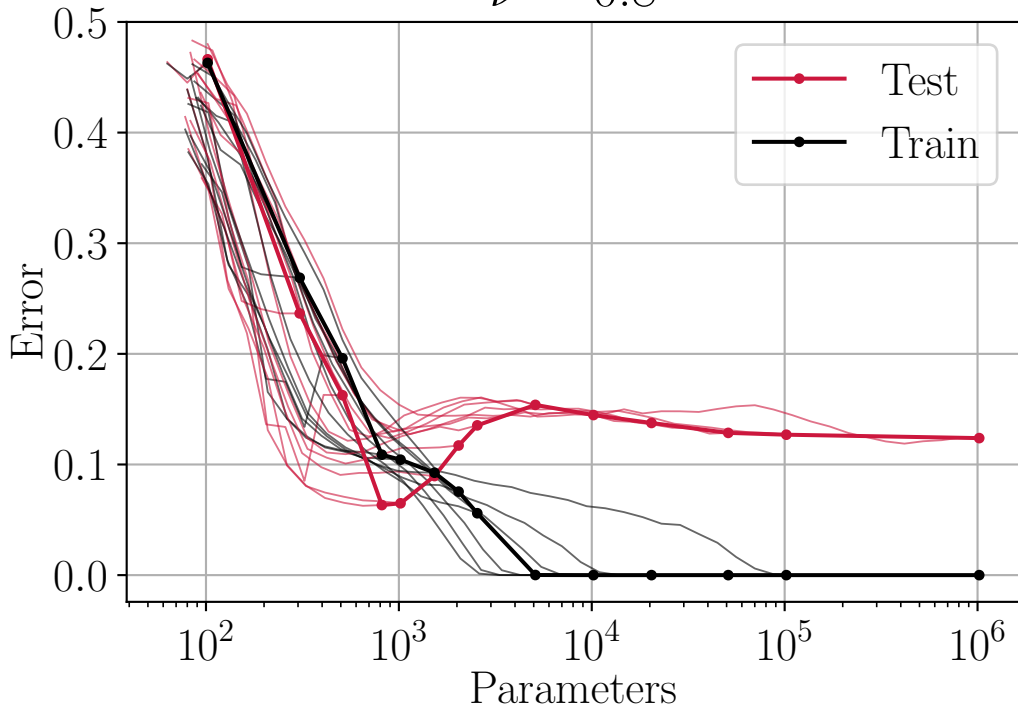

Supplement: supplementary_material [file attachment]

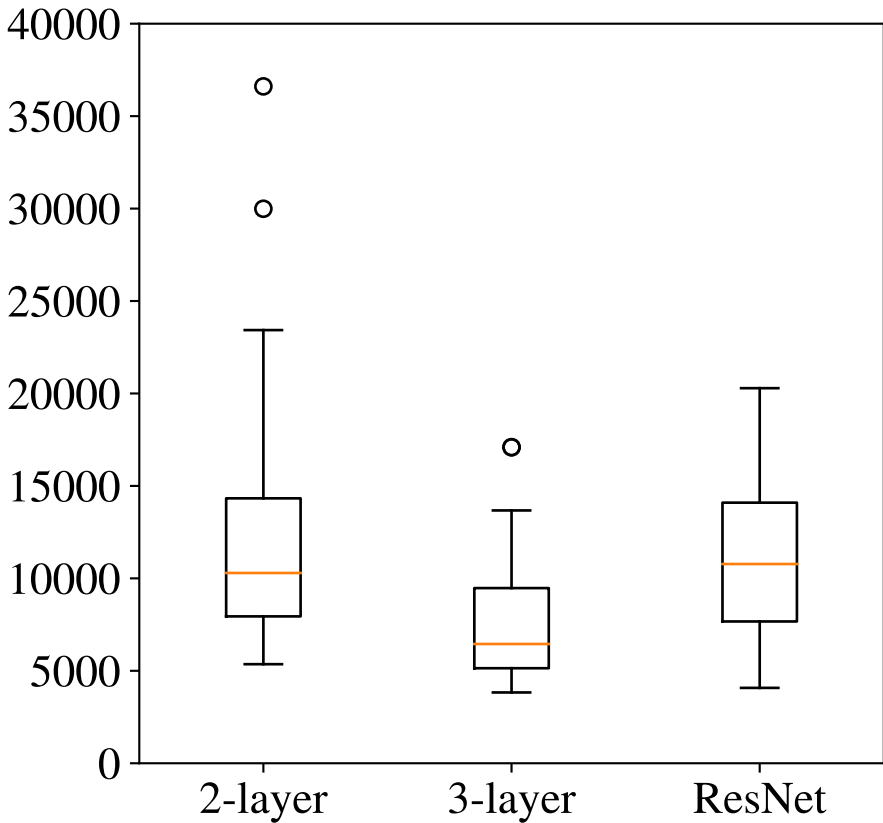

Supplement: supplementary_material [file attachment]

$\nu = 0.8$

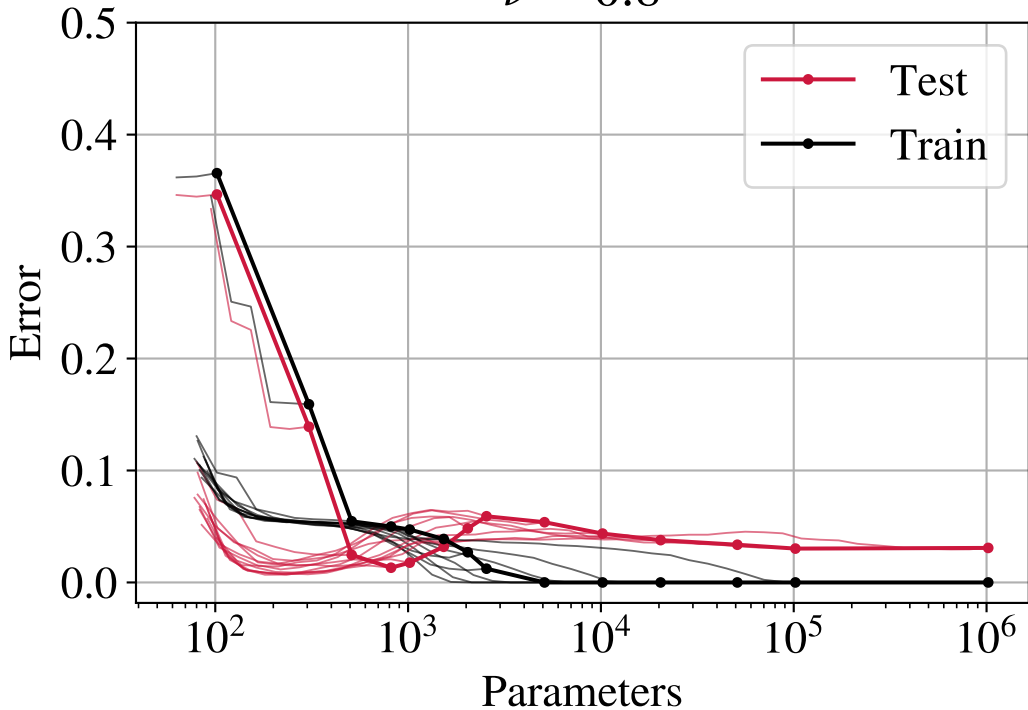

Supplement: supplementary_material [file attachment]

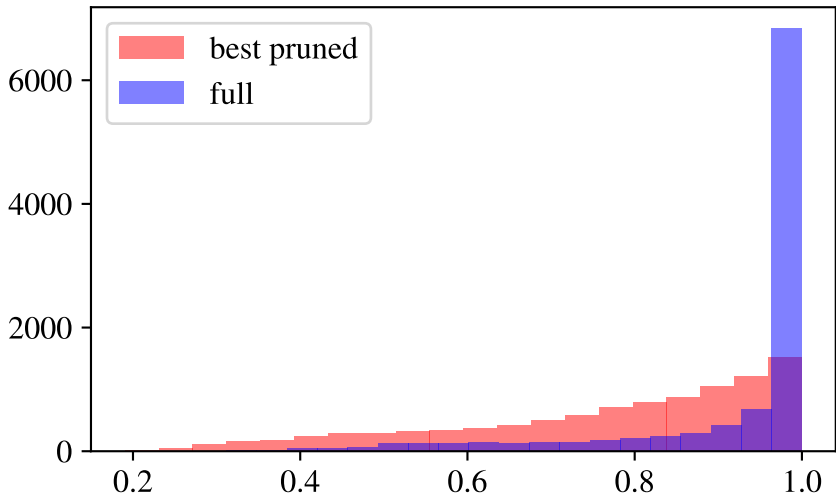

Supplement: supplementary_material [file attachment]

$$\nu = 0.5$$

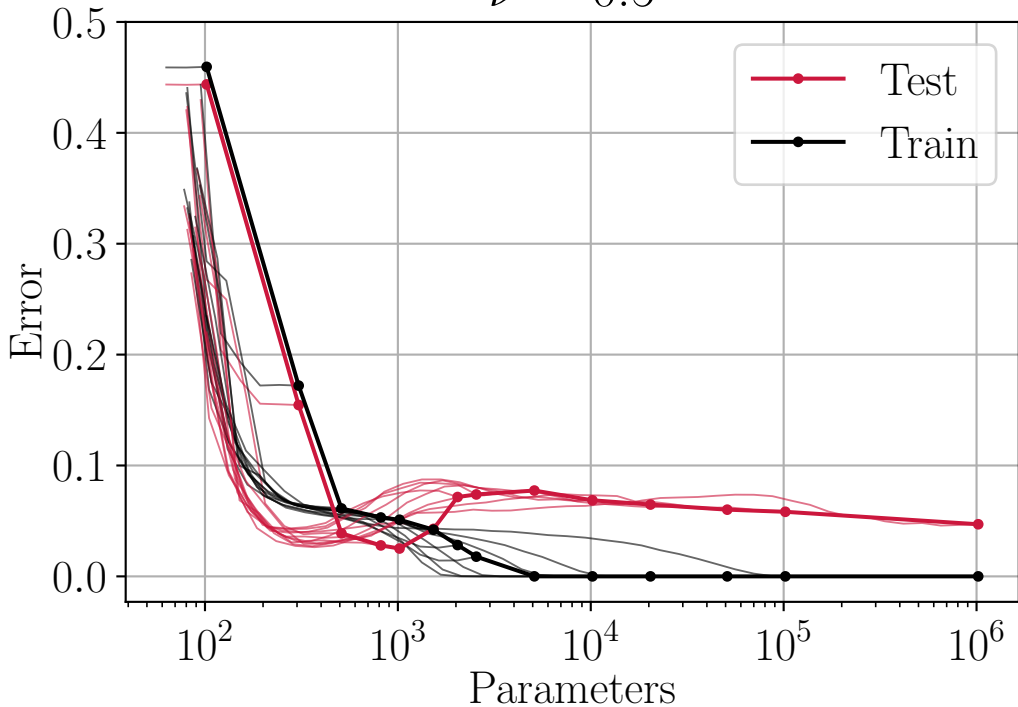

Supplement: supplementary_material [file attachment]

Best pruned

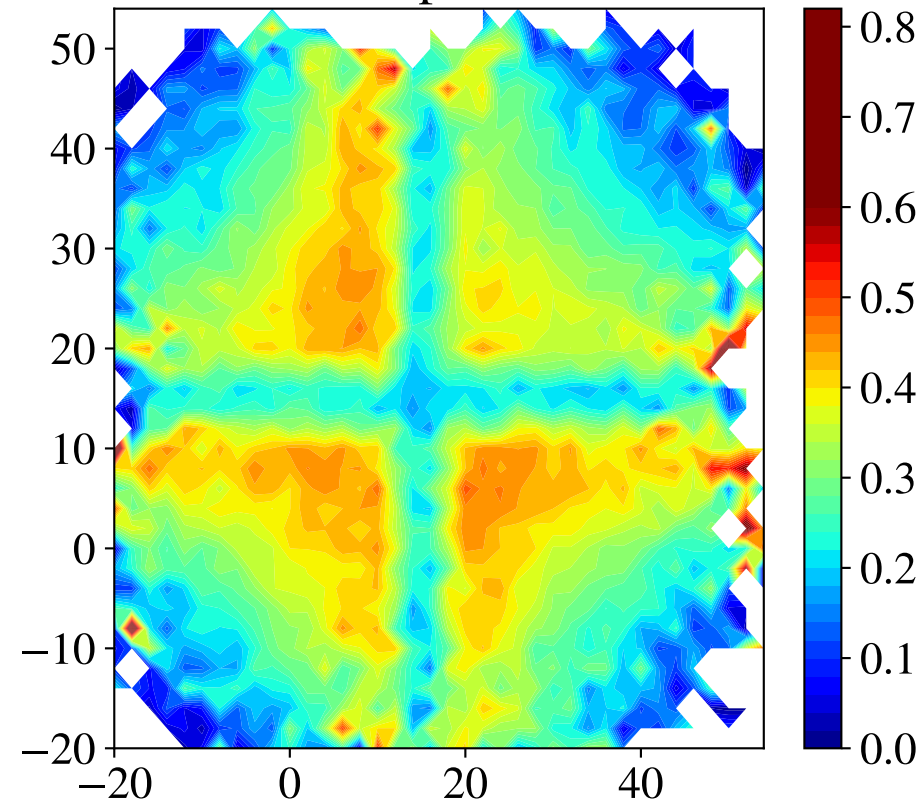

Full

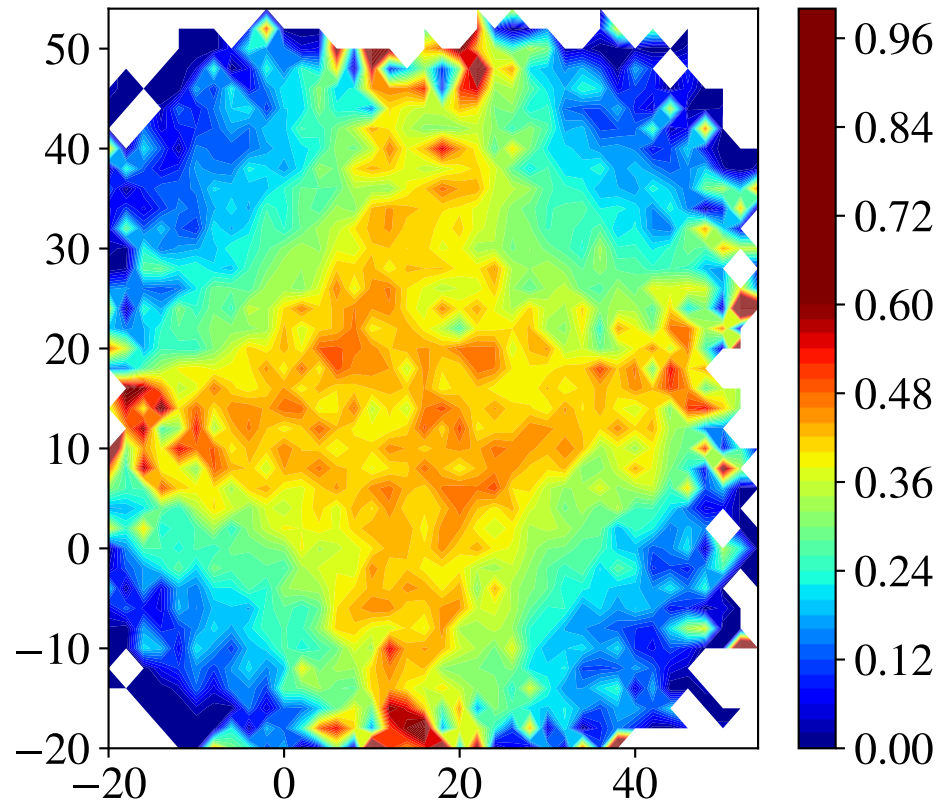

Supplement: supplementary_material [file attachment]

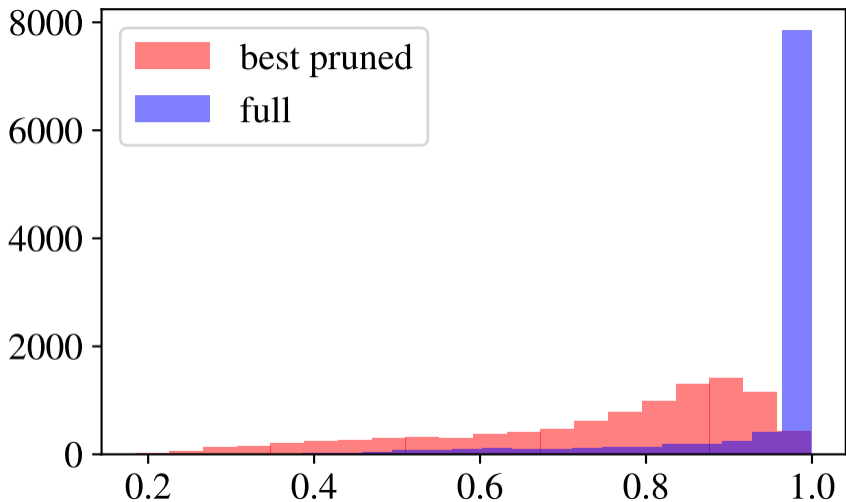

Supplement: supplementary_material [file attachment]

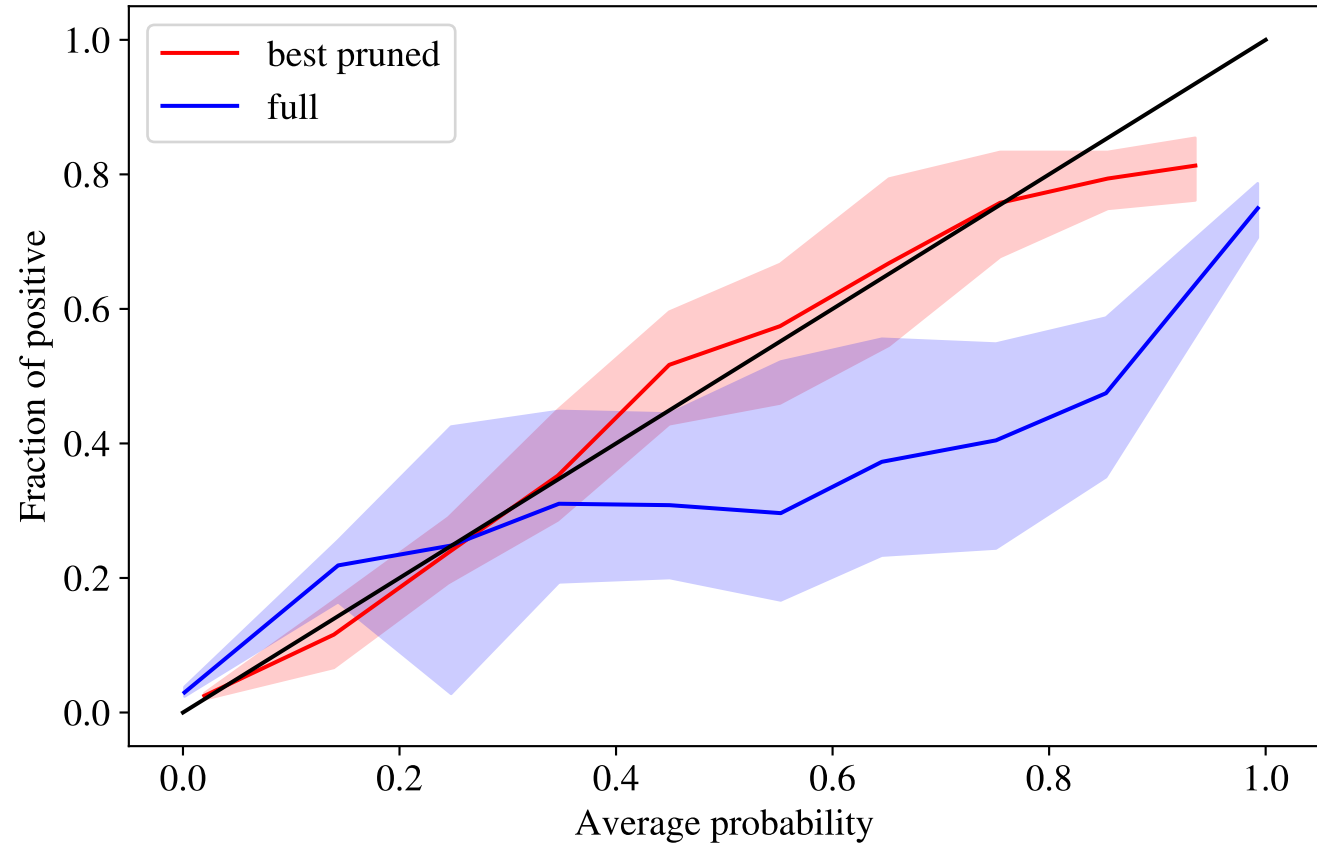

Supplement: supplementary_material [file attachment]

$$\nu = 1$$

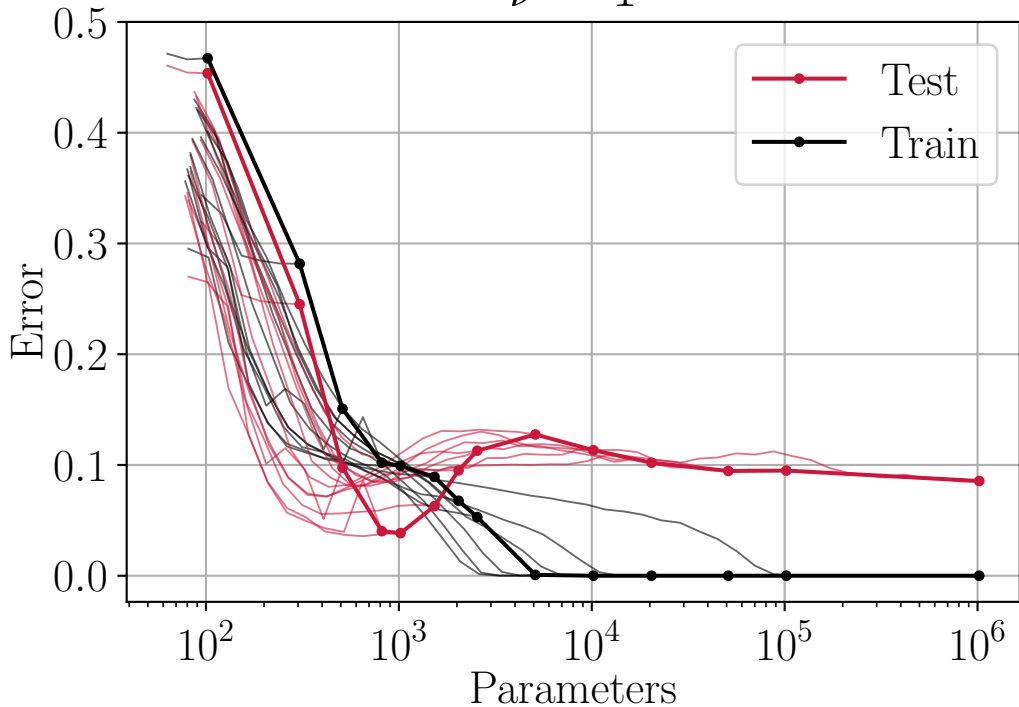

Supplement: supplementary_material [file attachment]

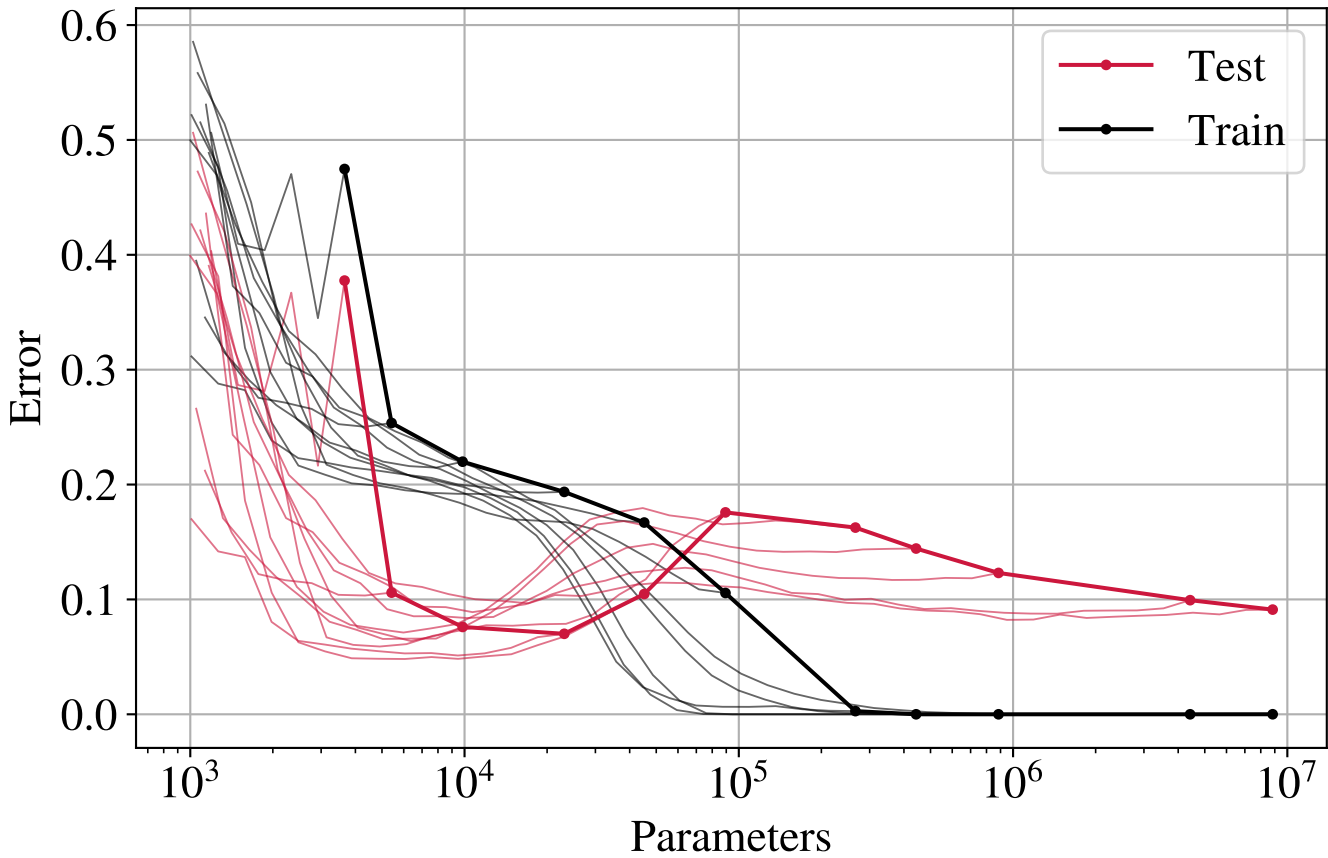

Supplement: supplementary_material [file attachment]

# XOR

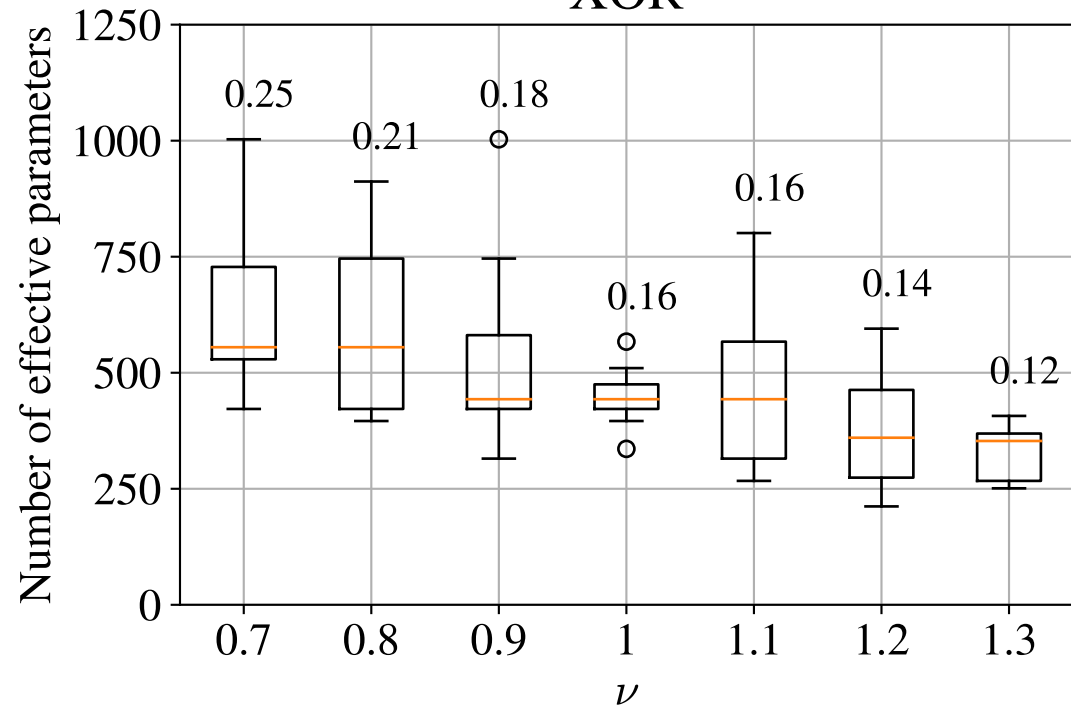

Supplement: supplementary_material [file attachment]

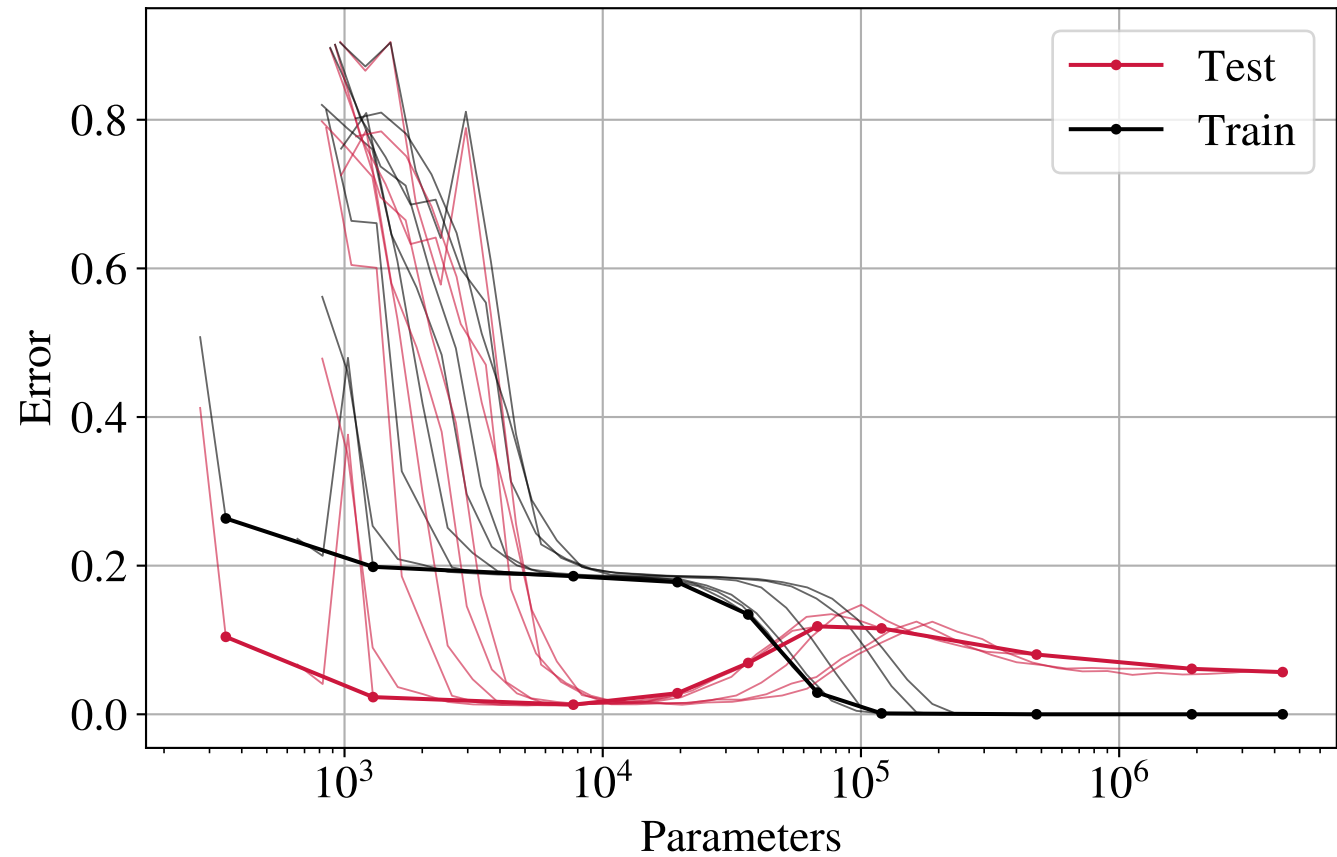

Supplement: supplementary_material [file attachment]

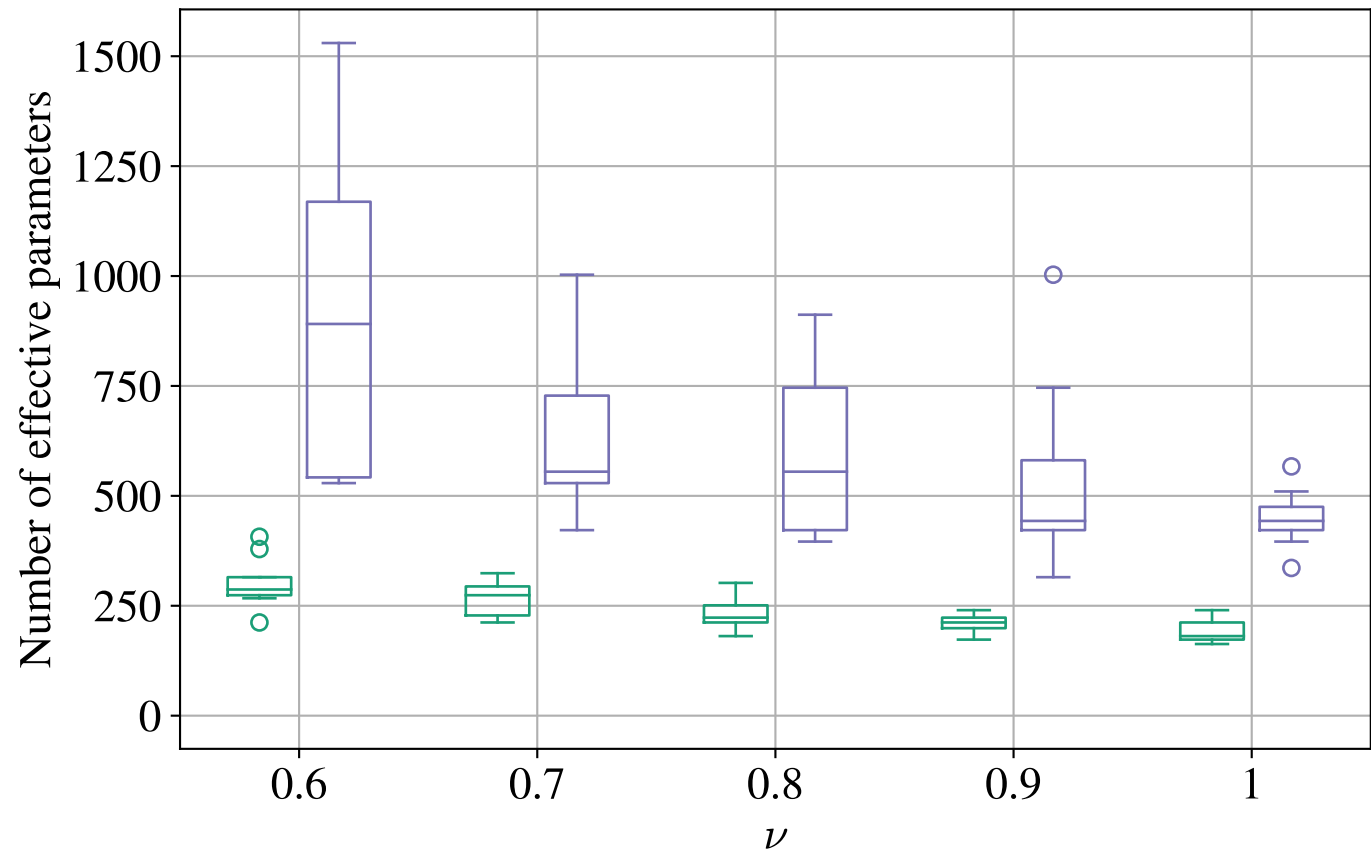

Supplement: supplementary_material [file attachment]

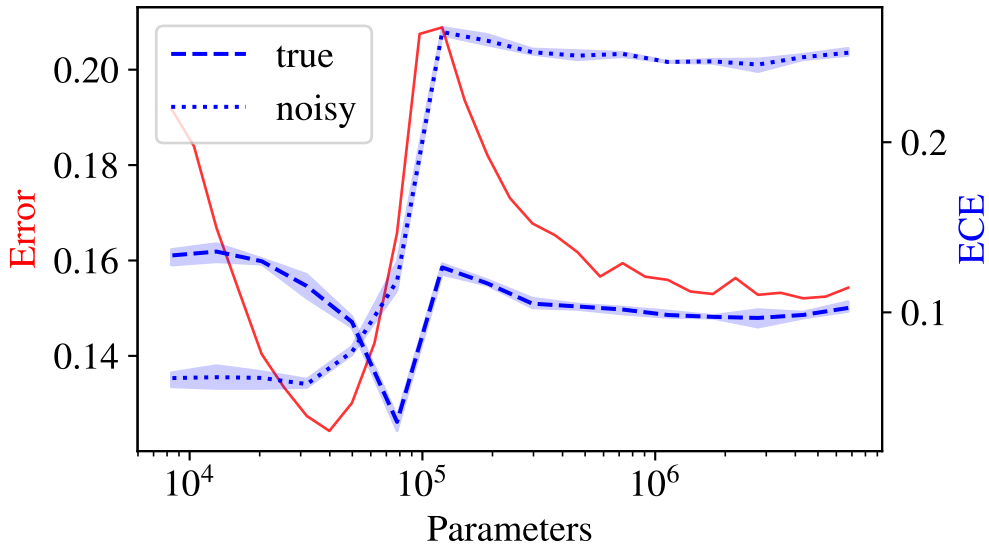

Supplement: supplementary_material [file attachment]

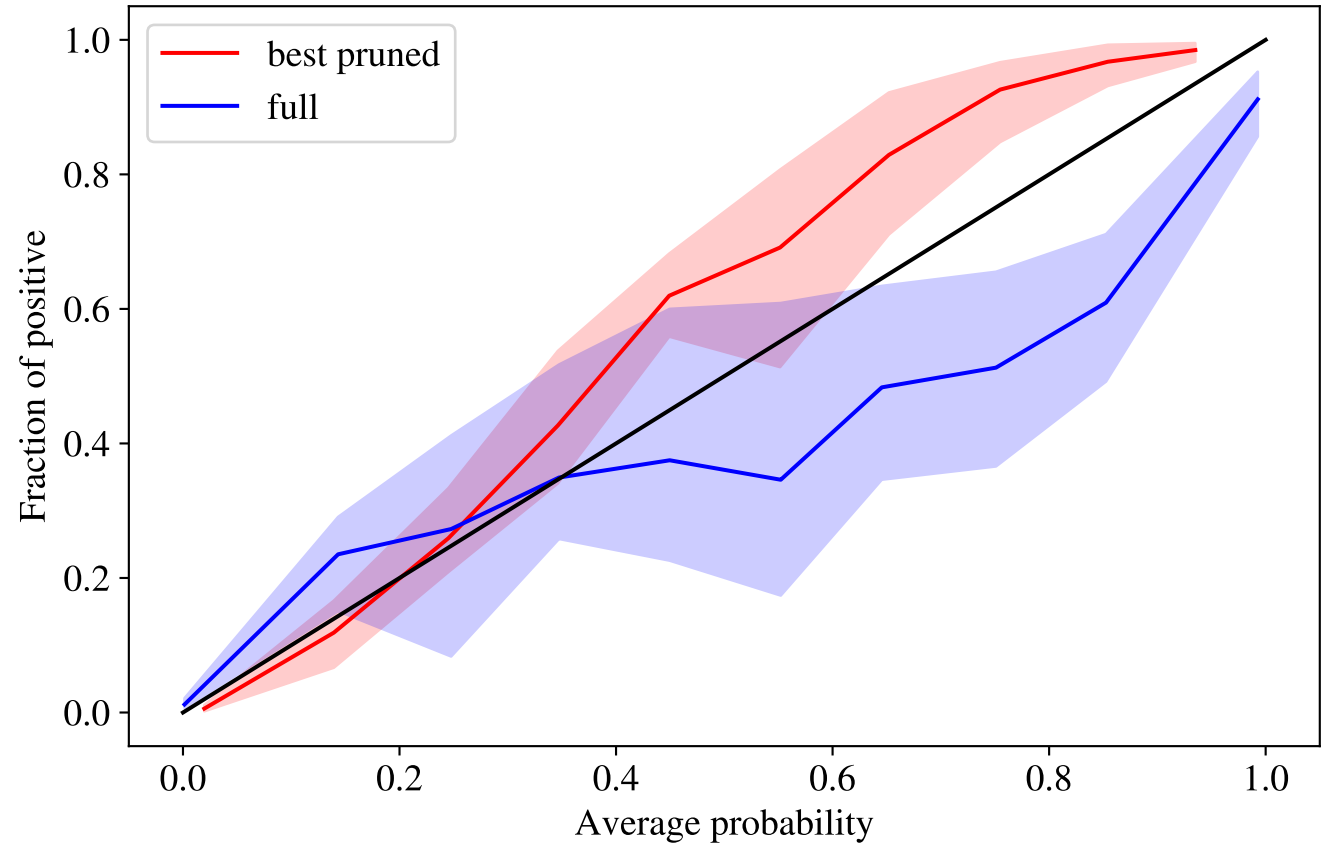

Supplement: supplementary_material [file attachment]
